# Supplementary material
Source: publisher site journal article supplement (https://www.dovepress.com/get_supplementary_file.php?f=+406057.docx)
Supplement: Supplementary file 1 [file get_supplementary_file.php]

Supplementary table 1: Temperature change in the ipsilateral side of the block

| Temperature change | 5 min | 10 min | 15 min | 25 min |
| --- | --- | --- | --- | --- |
| Tip-little finger temperature (°C) | | | | |
| Successful Ulnar nerve block (n=67) | 0.5 ±0.9 | 1.0 ±1.1 | 1.5 ±1.4 | 2.0 ±1.4 |
| Failed Ulnar nerve block (n=13) | -0.2 ±0.3 | -0.2 ±0.2 | -0.2 ±0.4 | -0.2 ±0.4 |
| *P*-value | 0.008 | 0.001 | <0.001 | <0.001 |
| Tip-index finger temperature (°C) | | | | |
| Successful median nerve block (n=71) | 0.5 ±0.9 | 0.9 ±1.3 | 1.6 ±1.5 | 1.9 ±1.5 |
| Failed median nerve block (n=9) | -0.2 ±0.3 | -0.2 ±0.3 | -0.2 ±0.2 | -0.2 ±0.3 |
| *P*-value | 0.047 | 0.010 | 0.001 | <0.001 |
| Base-dorsal index finger temperature (°C) | | | | |
| Successful radial nerve block (n=71) | 0.4 ±0.8 | 0.7 ±1.3 | 1.2 ±1.4 | 1.4 ±1.4 |
| Failed radial nerve block (n=9) | -0.2 ±0.3 | -0.4 ±0.6 | -0.4 ±0.4 | -0.4 ±0.4 |
| *P*-value | 0.026 | 0.009 | 0.001 | <0.001 |

Supplementary table 2: Temperature change in the contralateral side

| Temperature change | 5 min | 10 min | 15 min | 25 min |
| --- | --- | --- | --- | --- |
| Tip-little finger temperature (°C) | | | | |
| Successful Ulnar nerve block (n=67) | -0.2 ±1.5 | -0.2 ±1.6 | -0.1 ±1.5 | -0.1 ±1.5 |
| Failed Ulnar nerve block (n=13) | -0.2 ±0.4 | -0.2 ±0.4 | -0.3 ±0.5 | -0.2 ±0.3 |
| *P*-value | 0.989 | 0.975 | 0.528 | 0.699 |
| Tip-index finger temperature (°C) | | | | |
| Successful median nerve block (n=71) | -0.2 ±0.5 | -0.2 ±0.5 | -0.2 ±0.5 | -0.1 ±0.5 |
| Failed median nerve block (n=9) | -0.1 ±0.2 | -0.2 ±0.2 | -0.1 ±0.3 | -0.1 ±0.3 |
| *P*-value | 0.734 | 0.897 | 0.858 | 0.838 |
| Base-dorsal index finger temperature (°C) | | | | |
| Successful radial nerve block (n=71) | -0.2 ±0.4 | 0.0 ±1.2 | -0.2 ±0.4 | -0.2 ±0.5 |
| Failed radial nerve block (n=9) | -0.1 ±0.2 | -0.1 ±0.3 | 0.0 ±0.4 | -0.1 ±0.4 |
| *P*-value | 0.771 | 0.824 | 0.266 | 0.554 |

Supplementary table 3: Temperature change in the index finger and dorsal index finger in successful and failed musculocutaneous nerve block.

| Temperature change | 5 min | 10 min | 15 min | 25 min |
| --- | --- | --- | --- | --- |
| Tip-little finger temperature change (°C) | | | | |
| Successful block(n=65) | 0.4 ±0.9 | 0.8 ±1.1 | 1.4 ±1.4 | 1.8 ±1.5 |
| Failed block(n=6) | 1.1 ±0.9 | 2.0 ±1.0 | 2.1 ±1.6 | 2.6 ±1.4 |
| *P*-value | 0.048* | 0.013* | 0.224 | 0.237 |
| Tip-index finger temperature change (°C) | | | | |
| Successful block(n=65) | 0.4 ±0.9 | 0.9 ±1.2 | 1.5 ±1.4 | 1.8 ±1.4 |
| Failed block(n=6) | 0.4 ±1.1 | 0.6 ±1.6 | 0.8 ±1.8 | 1.2 ± 2.0 |
| *P*-value | 0.893 | 0.562 | 0.105 | 0.138 |
| Base-dorsal index finger temperature change (°C) | | | | |
| Successful block (n=65) | 0.4 ±0.7 | 0.7 ±1.1 | 1.2 ±1.4 | 1.4 ±1.4 |
| Failed block (n=6) | 0.1 ±1.1 | 0.1 ±1.7 | 0.5 ±1.7 | 0.6 ±1.7 |
| *P*-value | 0.186 | 0.087 | 0.091 | 0.057 |

Supplementary Table 4: The AUC analysis for detection of musculocutaneous nerve block failure (n=16/71)

|  | AUC (95%CI) | Sensitivity % (95% CI) | Specificity % (95% CI) | PPV % (95% CI) | NPV %  (95% CI) | Cut-off value |
| --- | --- | --- | --- | --- | --- | --- |
| Tip-little finger temperature change | | | | | | |
| 5-min | 0.77 (0.66-0.86) | 83 (36-100) | 77 (65-87) | 25 (9-49) | 98 (90-100) | >0.5°C |
| 10-min | 0.85 (0.74-0.92) | 100 (54-100) | 63 (50-75) | 20 (8-39) | 100 (91-100) | >0.8°C |

AUC: area under receiver operating characteristic curve, CI: confidence interval, NPV: negative predictive value, PPV: positive predictive value.
